# Supplementary material
Source: PubMed Central journal article supplement (PMC9931979)
Supplement: 40744_2022_500_MOESM1_ESM.pdf [file 40744_2022_500_MOESM1_ESM.pdf]

## Supplementary material

### **The RA-BE-REAL Multinational, Prospective, Observational Study in Patients with Rheumatoid Arthritis Receiving Baricitinib, Targeted Synthetic, or Biologic Disease-Modifying Therapies: A 6-Month Interim Analysis**

Author(s): Rieke Alten<sup>1</sup>, Gerd R. Burmester<sup>2</sup>, Marco Matucci-Cerinic<sup>3,4</sup>, Jean H. Salmon<sup>5</sup>, Pedro Lopez-Romero<sup>6\*</sup>, Walid Fakhouri<sup>6</sup>, Inmaculada de la Torre<sup>6</sup>, Liliana Zaremba-Pechmann<sup>7</sup>, Thorsten Holzkämper<sup>6</sup>, Bruno Fautrel<sup>8</sup>

Author affiliation(s): <sup>1</sup>Department of Internal Medicine and Rheumatology, Schlosspark-Klinik, University Medicine Berlin, Berlin, Germany; <sup>2</sup>Department of Rheumatology and Clinical Immunology, Charité Universitätsmedizin Berlin, Berlin, Germany; <sup>3</sup>Unit of Immunology, Rheumatology, Allergy and Rare Diseases (UnIRAR), IRCCS San Raffaele Hospital, Milan, Italy; <sup>4</sup>Department of Experimental and Clinical Medicine, Division of Rheumatology AOUC, University of Florence, Florence, Italy; <sup>5</sup>University of Reims Champagne-Ardenne, Faculty of Medicine, UR 3797, Reims, F-51095, France, and Rheumatology Department, Maison Blanche Hospital, Reims University Hospitals, Reims, F-51092, France; <sup>6</sup>Eli Lilly and Company, Indianapolis, Indiana, USA; <sup>7</sup>HaaPACS, Schriesheim, Germany; <sup>8</sup>Sorbonne University – Assistance Publique Hôpitaux de Paris, Pitié Salpêtrière Hospital, Department of Rheumatology, Paris, France and PEPITES team, Pierre Louis Institute of Epidemiology and Public Health, INSERM UMRS 11376, Paris, France

\* Former Lilly employee.

Corresponding author

Rieke Alten

Address: Department of Internal Medicine and Rheumatology, Schlosspark-Klinik, University Medicine Berlin, Berlin, Germany

Phone: +49 30 3264-1325

Fax: +49 30 3264-1324

Email: [Rieke.Alden@schlosspark-klinik.de](mailto:Rieke.Alden@schlosspark-klinik.de)

**Supplementary Table 1.** Analysis of RA treatment discontinuations over 6 months for cohort A by treatment history (b/tsDMARD naïve or experienced), monotherapy or in combination with csDMARDs

|                                                                                             | <b>Cohort A</b><br><b>Baricitinib (2 or 4 mg)</b><br><b>(N=509)</b> |                                                      |                                                        |                                                 |                                                   |                                                                      |                                      |                                                 |
|---------------------------------------------------------------------------------------------|---------------------------------------------------------------------|------------------------------------------------------|--------------------------------------------------------|-------------------------------------------------|---------------------------------------------------|----------------------------------------------------------------------|--------------------------------------|-------------------------------------------------|
|                                                                                             | <b>Baricitinib</b><br><b>(4 mg)</b><br><b>(N=450)</b>               | <b>Baricitinib</b><br><b>(2 mg)</b><br><b>(N=59)</b> | <b>Naïve to</b><br><b>ts/bDMARDs</b><br><b>(N=245)</b> | <b>One</b><br><b>ts/bDMARD</b><br><b>(N=67)</b> | <b>Two</b><br><b>ts/bDMARDs</b><br><b>(N=110)</b> | <b>More than</b><br><b>two</b><br><b>ts/bDMARDs</b><br><b>(N=87)</b> | <b>Monotherapy</b><br><b>(N=259)</b> | <b>With</b><br><b>csDMARD</b><br><b>(N=250)</b> |
| Patients who completed the 6-month visit                                                    | 291 (64.7)                                                          | 45 (76.3)                                            | 156 (63.7)                                             | 45 (67.2)                                       | 79 (71.8)                                         | 56 (64.4)                                                            | 171 (66.0)                           | 165 (66.0)                                      |
| Cumulative incidence of RA treatment discontinuation over 6 months, % (95% CI) <sup>a</sup> | 17.2<br>(13.3–22.2)                                                 | 11.7<br>(5.0–26.1)                                   | 10.0<br>(6.1–16.2)                                     | 24.8<br>(14.6–40.4)                             | 16.5<br>(9.9–26.7)                                | 28.0<br>(17.8–42.3)                                                  | 13.2<br>(8.9–19.4)                   | 20.0<br>(14.6–27.1)                             |

Data are presented as n (%) unless otherwise indicated.

<sup>a</sup>Cumulative incidence developed with reverse Kaplan–Meier estimate. Patients with sustained clinical response were excluded from the primary outcome analysis. Patients who were lost to follow-up for any reason, including death, were censored at the last observation available.

<sup>b</sup>/tsDMARD, biological or targeted synthetic disease-modifying antirheumatic drug; CI, confidence interval; csDMARD, conventional synthetic disease-modifying antirheumatic drug; RA, rheumatoid arthritis.

**Supplementary Table 2.** RA-related health care resource utilization over 6 months of treatment with baricitinib (cohort A) or any other tsDMARD or any bDMARD (cohort B) per patient and per country

|                                                                                     | France           |                  | Germany           |                   | Italy            |                  | Spain            |                  | UK               |                  |
|-------------------------------------------------------------------------------------|------------------|------------------|-------------------|-------------------|------------------|------------------|------------------|------------------|------------------|------------------|
|                                                                                     | Cohort A<br>N=79 | Cohort B<br>N=74 | Cohort A<br>N=159 | Cohort B<br>N=135 | Cohort A<br>N=45 | Cohort B<br>N=73 | Cohort A<br>N=28 | Cohort B<br>N=37 | Cohort A<br>N=25 | Cohort B<br>N=52 |
| <b>Physician visits and hospitalizations, mean (SD)</b>                             |                  |                  |                   |                   |                  |                  |                  |                  |                  |                  |
| Visits to primary care physicians, outpatient physicians, and emergency departments | 1.1 (1.5)        | 1.4 (2.0)        | 1.4 (2.3)         | 1.5 (2.3)         | 1.6 (2.7)        | 0.9 (1.3)        | 2.3 (3.7)        | 1.3 (2.0)        | 1.4 (1.6)        | 2.2 (2.6)        |
| Visits to other health care professionals                                           | 0.3 (1.5)        | 4.1 (9.5)        | 1.3 (5.2)         | 2.6 (8.9)         | 0.1 (0.5)        | 0.1 (0.4)        | 1.8 (5.9)        | 0.5 (2.2)        | 0.5 (1.0)        | 1.1 (2.2)        |
| Visits to other health care professionals that included an injection                | 0.2 (1.4)        | 0.6 (2.2)        | 0.0 (0.3)         | 0.2 (0.9)         | 0.0 (0.0)        | 0.0 (0.0)        | 0.8 (3.7)        | 0.2 (1.0)        | 0.2 (0.5)        | 0.1 (0.2)        |
| Hospitalizations                                                                    | 0.1 (0.4)        | 0.0 (0.2)        | 0.0 (0.1)         | 0.0 (0.2)         | 0.0 (0.0)        | 0.0 (0.0)        | 0.0 (0.0)        | 0.0 (0.0)        | 0.0 (0.0)        | 0.1 (0.3)        |
| Duration of hospitalization, days                                                   | 0.3 (1.6)        | 0.0 (0.2)        | 0.1 (0.5)         | 0.2 (1.3)         | 0.0 (0.0)        | 0.0 (0.0)        | 0.0 (0.0)        | 0.0 (0.0)        | 0.0 (0.0)        | 0.1 (0.9)        |
| <b>Diagnostic imaging tests, mean (SD)</b>                                          |                  |                  |                   |                   |                  |                  |                  |                  |                  |                  |
| All tests                                                                           | 0.3 (0.7)        | 0.5 (0.8)        | 0.7 (1.4)         | 0.6 (1.3)         | 0.3 (0.7)        | 0.2 (0.5)        | 0.5 (1.0)        | 0.4 (0.7)        | 0.3 (0.7)        | 0.2 (0.5)        |
| X-ray                                                                               | 0.1 (0.3)        | 0.3 (0.6)        | 0.1 (0.2)         | 0.1 (0.3)         | 0.1 (0.3)        | 0.1 (0.3)        | 0.1 (0.5)        | 0.2 (0.5)        | 0.2 (0.4)        | 0.2 (0.5)        |
| Ultrasound                                                                          | 0.1 (0.5)        | 0.2 (0.4)        | 0.5 (1.2)         | 0.4 (1.1)         | 0.1 (0.4)        | 0.0 (0.2)        | 0.3 (0.7)        | 0.2 (0.5)        | 0.1 (0.5)        | 0.1 (0.3)        |
| Magnetic resonance imaging                                                          | 0.0 (0.2)        | 0.0 (0.2)        | 0.0 (0.2)         | 0.0 (0.2)         | 0.0 (0.3)        | 0.0 (0.2)        | 0.1 (0.3)        | 0.0 (0.2)        | 0.1 (0.4)        | 0.0 (0.0)        |
| <b>Laboratory tests, mean (SD)</b>                                                  |                  |                  |                   |                   |                  |                  |                  |                  |                  |                  |
| All laboratory tests                                                                | 14.2 (19.4)      | 12.5 (9.3)       | 11.5 (12.7)       | 14.7 (22.6)       | 7.1 (3.4)        | 8.3 (3.8)        | 8.5 (4.3)        | 7.9 (6.7)        | 8.0 (7.0)        | 9.4 (7.1)        |
| Erythrocyte sedimentation rate tests                                                | 4.4 (9.8)        | 2.8 (2.2)        | 2.3 (2.0)         | 2.8 (3.4)         | 1.5 (0.9)        | 1.8 (1.0)        | 1.8 (1.1)        | 1.8 (1.3)        | 2.4 (2.8)        | 2.2 (2.6)        |

|                                        |           |           |           |            |           |           |           |           |           |           |
|----------------------------------------|-----------|-----------|-----------|------------|-----------|-----------|-----------|-----------|-----------|-----------|
| C-reactive protein tests               | 3.4 (3.0) | 3.2 (2.2) | 2.7 (2.7) | 3.4 (3.5)  | 1.6 (0.9) | 1.9 (1.0) | 1.9 (1.0) | 1.8 (1.3) | 2.6 (2.7) | 2.9 (2.4) |
| Rheumatoid factor tests                | 0.0 (0.2) | 0.1 (0.5) | 2.8 (9.2) | 5.0 (20.9) | 0.0 (0.2) | 0.0 (0.2) | 0.6 (0.9) | 0.4 (0.6) | 0.0 (0.0) | 0.0 (0.0) |
| Anticyclic citrullinated peptide tests | 0.1 (0.2) | 0.1 (0.5) | 0.4 (1.3) | 0.3 (0.9)  | 0.0 (0.2) | 0.0 (0.2) | 0.3 (0.6) | 0.2 (0.4) | 0.0 (0.2) | 0.1 (0.5) |
| Creatinine tests                       | 2.9 (2.7) | 3.0 (2.3) | 2.2 (1.8) | 2.1 (2.1)  | 1.6 (1.1) | 1.9 (1.2) | 1.9 (1.0) | 1.9 (1.4) | 2.8 (2.6) | 3.4 (2.6) |
| Creatinine phosphokinase tests         | 0.2 (0.7) | 0.3 (0.8) | 0.2 (0.6) | 0.1 (0.3)  | 0.2 (0.4) | 0.2 (0.4) | 0.6 (0.8) | 0.4 (1.4) | 0.0 (0.0) | 0.0 (0.0) |
| Liver tests                            | 3.2 (2.8) | 3.2 (3.1) | 2.1 (1.8) | 2.1 (1.8)  | 1.7 (1.0) | 2.1 (1.1) | 1.8 (1.0) | 1.8 (1.4) | 2.8 (2.6) | 3.2 (2.6) |
| Complete blood count tests             | 4.4 (9.8) | 3.1 (2.3) | 1.7 (2.0) | 1.6 (1.7)  | 1.7 (1.0) | 2.1 (1.1) | 1.9 (0.9) | 1.7 (1.4) | 2.9 (2.8) | 3.6 (2.5) |

bDMARD, biologic disease-modifying antirheumatic drug; RA, rheumatoid arthritis; SD, standard deviation; tsDMARD, targeted synthetic disease-modifying antirheumatic drug.

**Supplementary Figure. Study design**

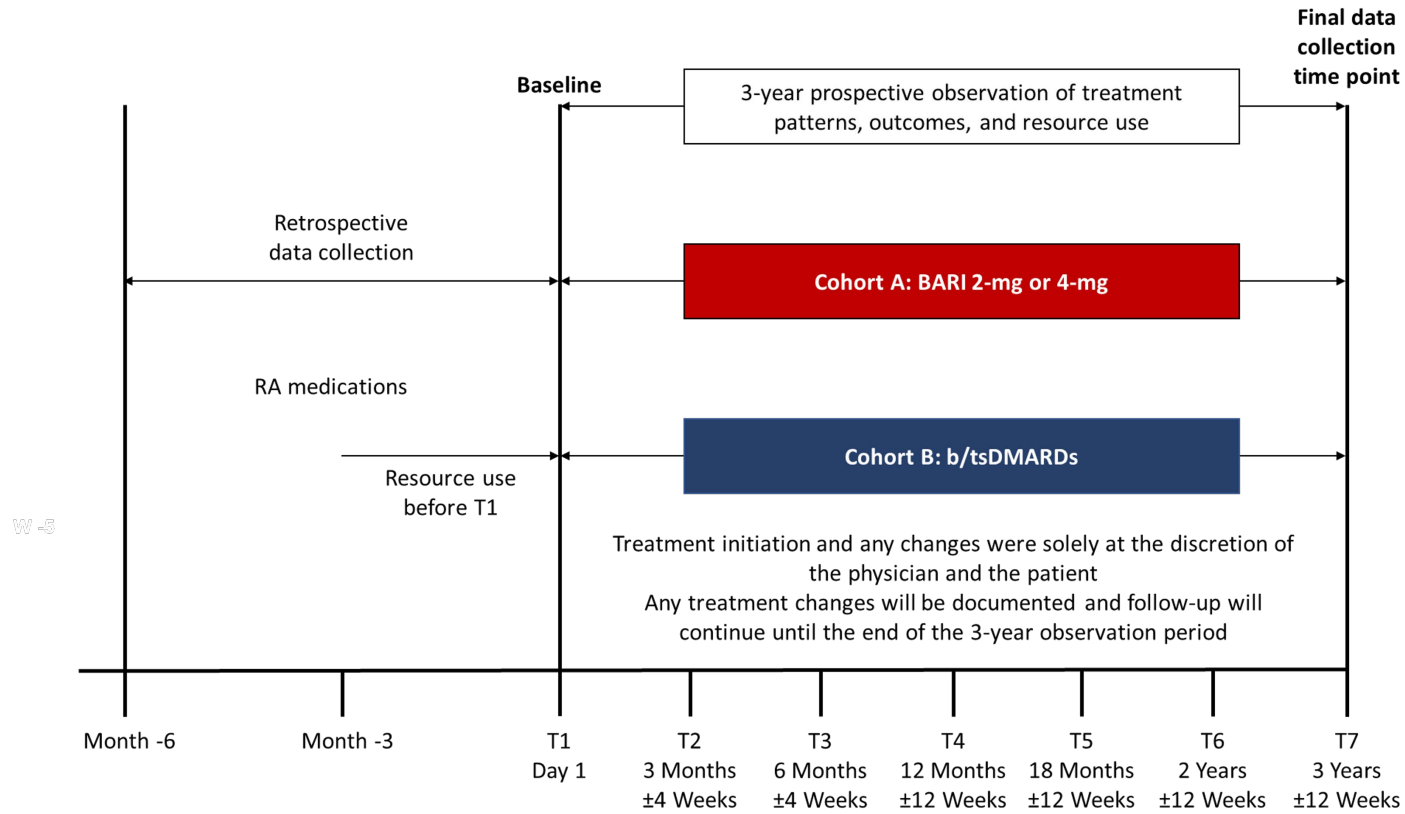

bDMARD, biologic disease-modifying antirheumatic drug; RA, rheumatoid arthritis; T, time point; tsDMARD, targeted synthetic disease-modifying antirheumatic drug
